# Supplementary material
Source: MDPI journal article supplement (https://www.mdpi.com/2073-445X/6/4/66)

**Supplementary Materials:** Maps of planted area for each crop by municipality. For each year planted area was sorted and divided in 10 breaks. Color intensity shows the ranking of each municipality in that ranked scale. White color is for the first rank with the less plantations and intense red for the largest rank. There are no data for some crops for some years, which is indicated as “no data”. Data from 1950 to 1991 come from agricultural census carried out by INEGI and data from 2003 to 2015 come from annual surveys carried out by SIAP (see text for details)

1. Avocado

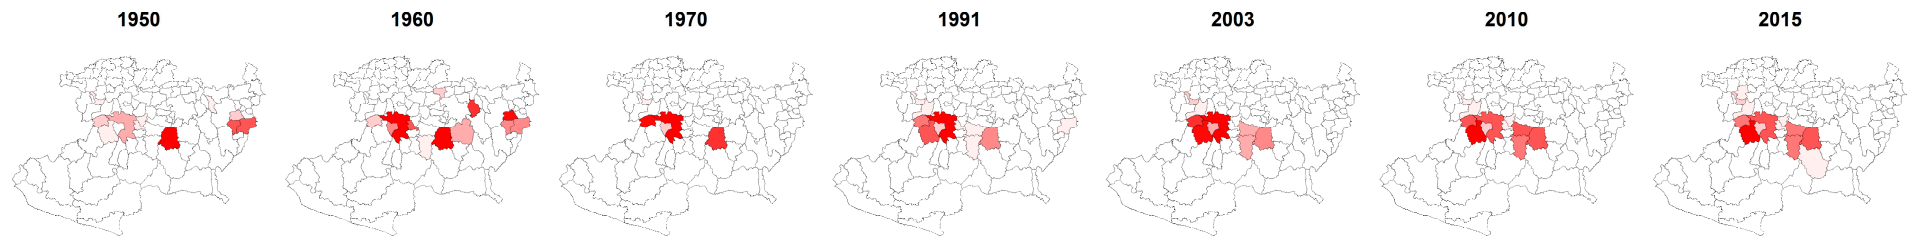

2. Banana

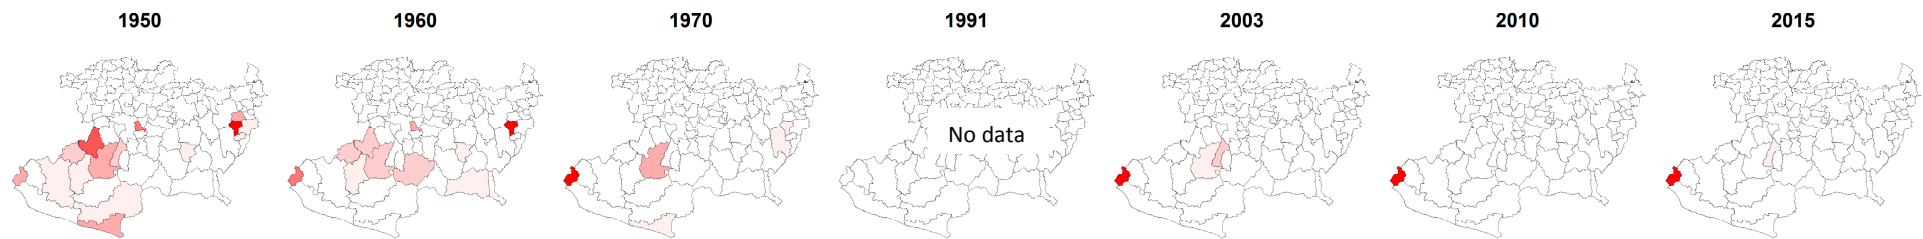

3. Beans

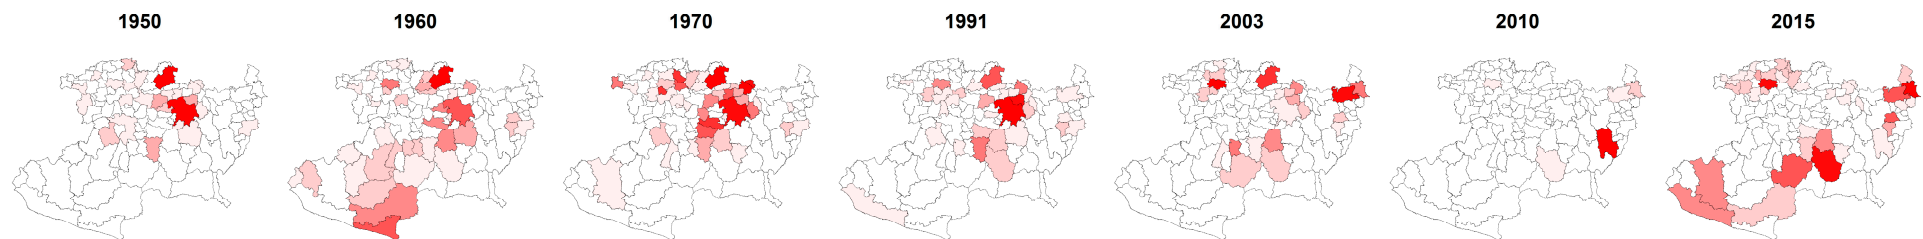

4. Blackberries

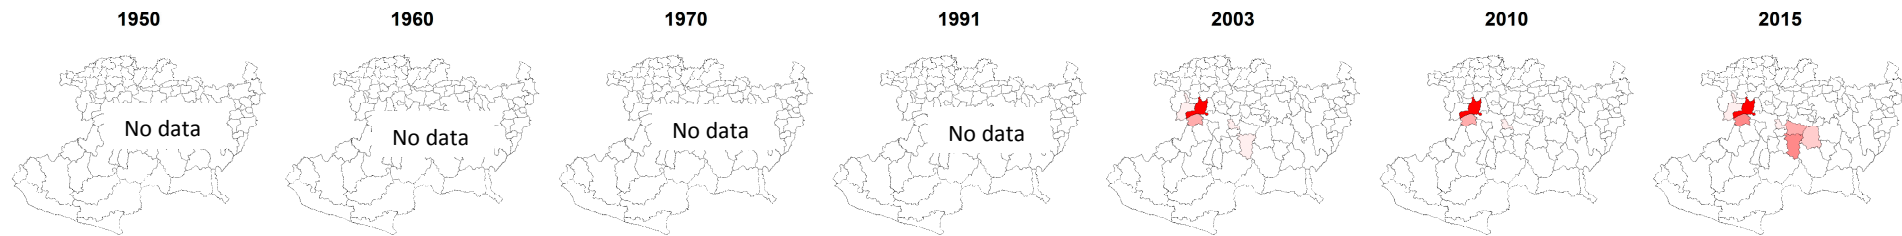

5. Fodder oats

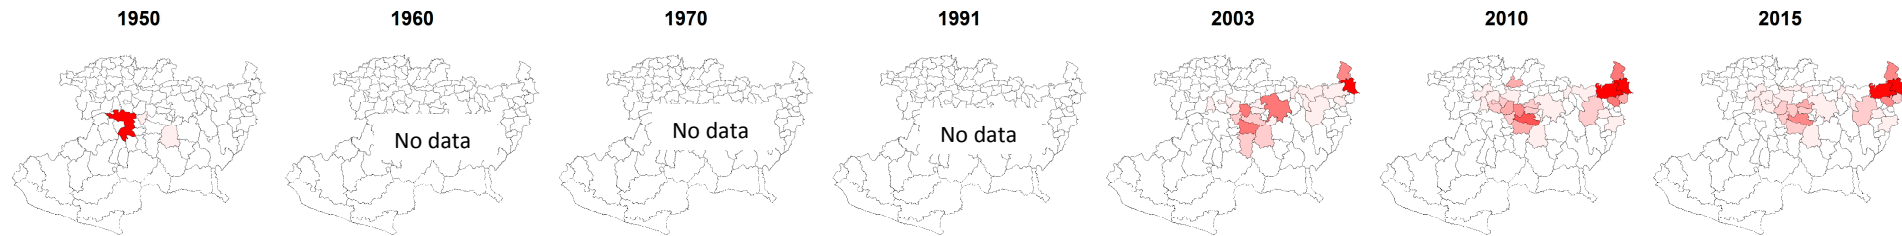

6. Fodder sorghum

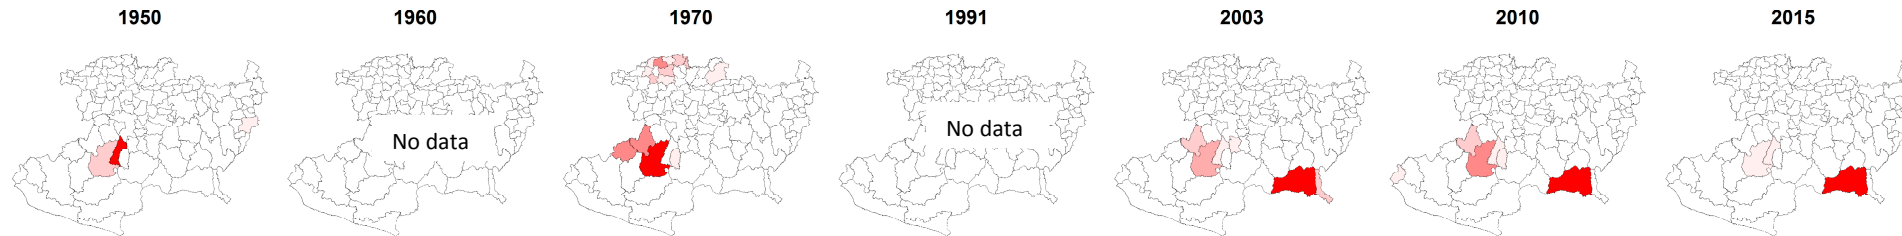

7. Grain sorghum

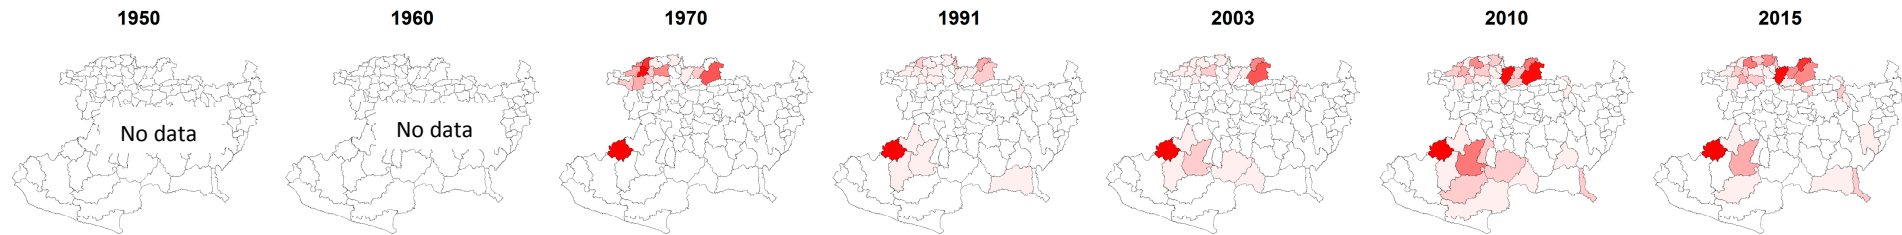

8. Grass

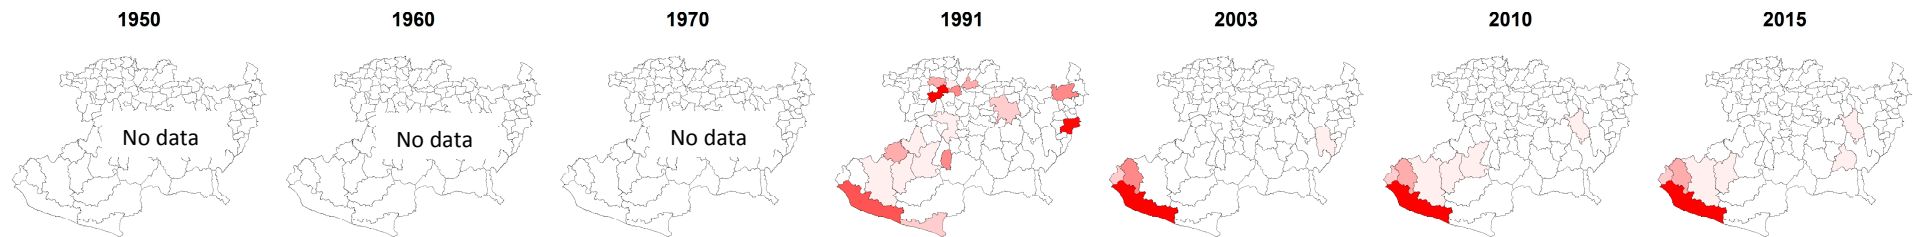

9. Green chili pepper

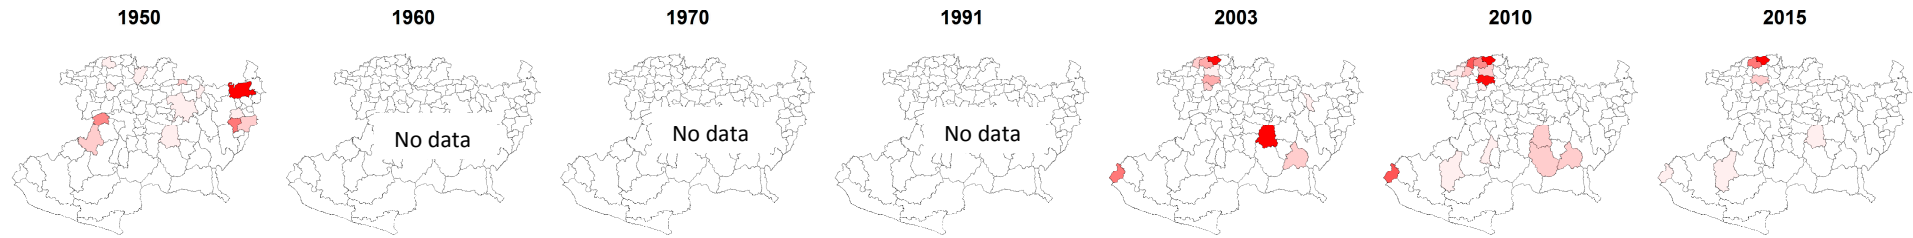

10. Guava

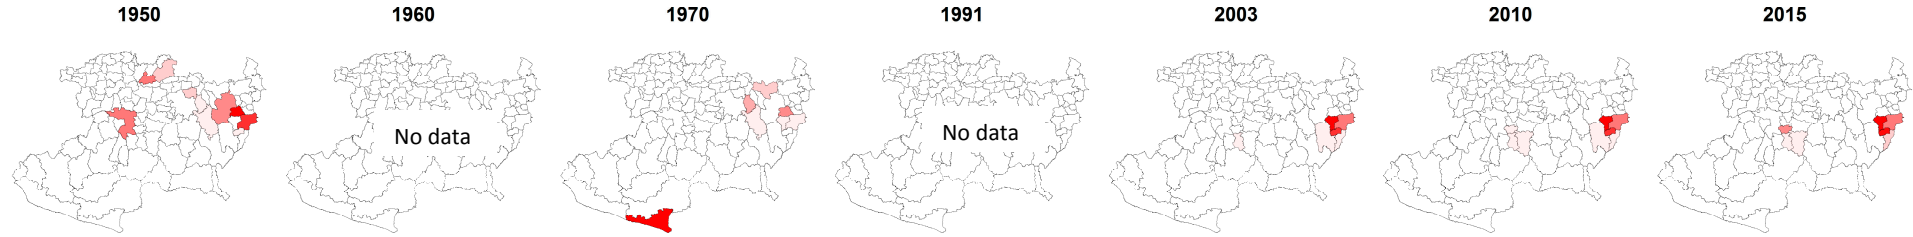

11. Lime

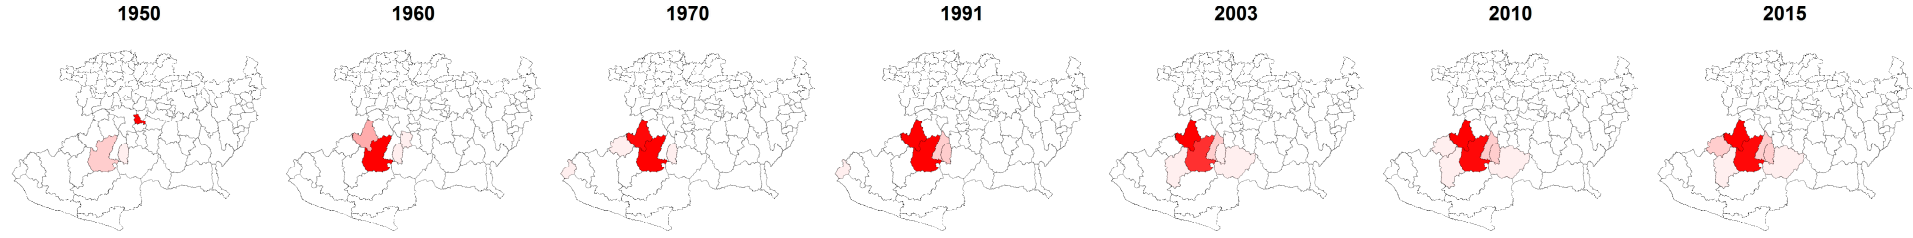

12. Maize

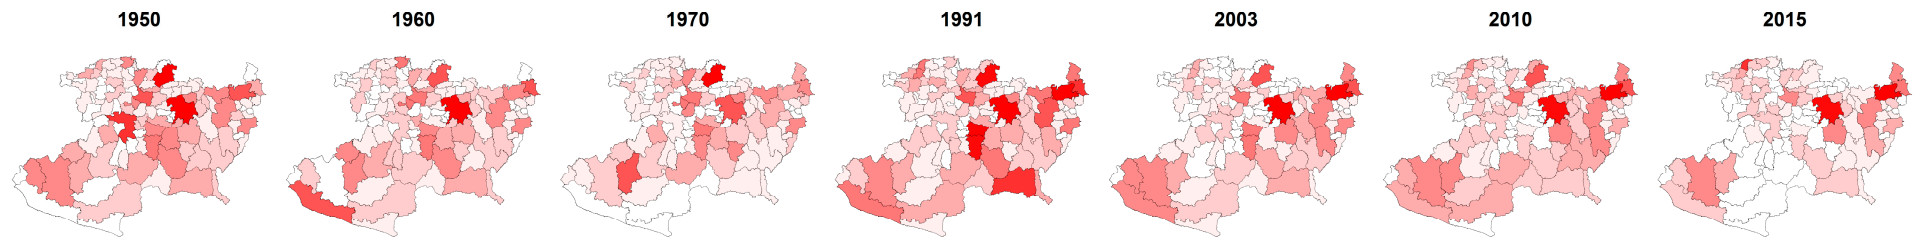

13. Mango

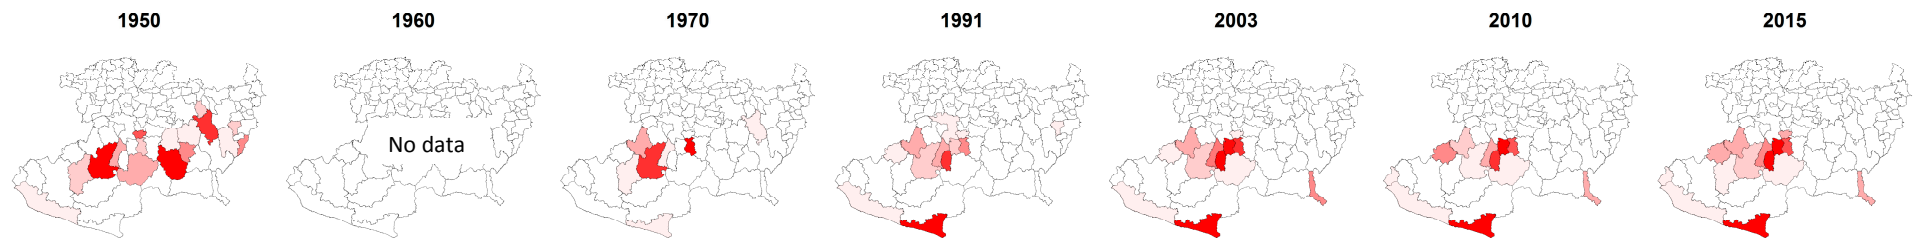

14. Melon

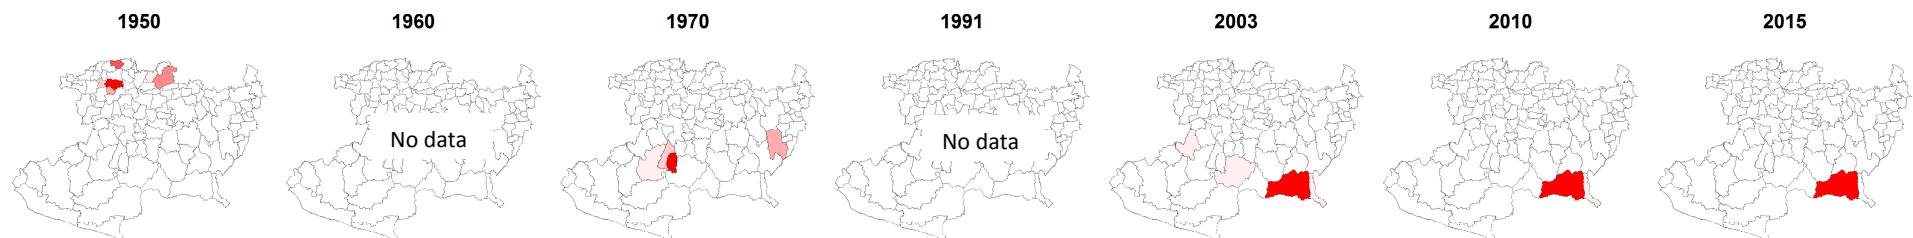

15. Onion

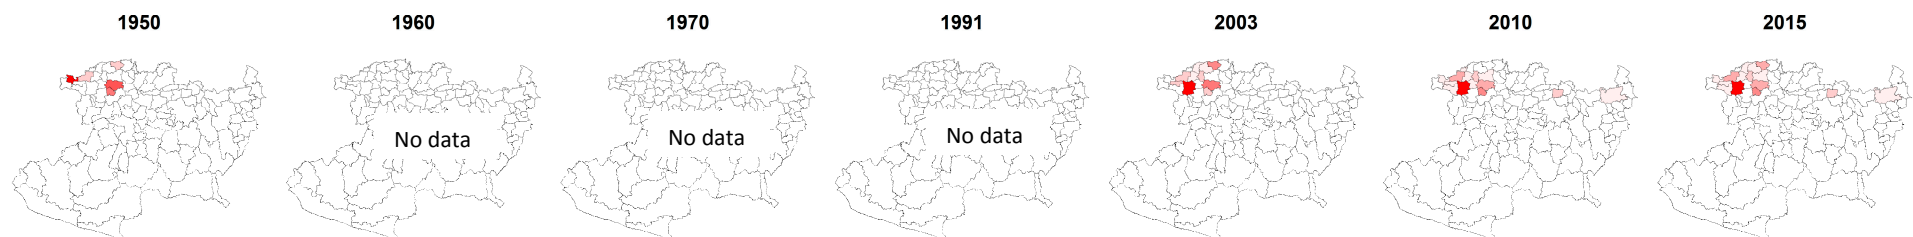

16. Papaya

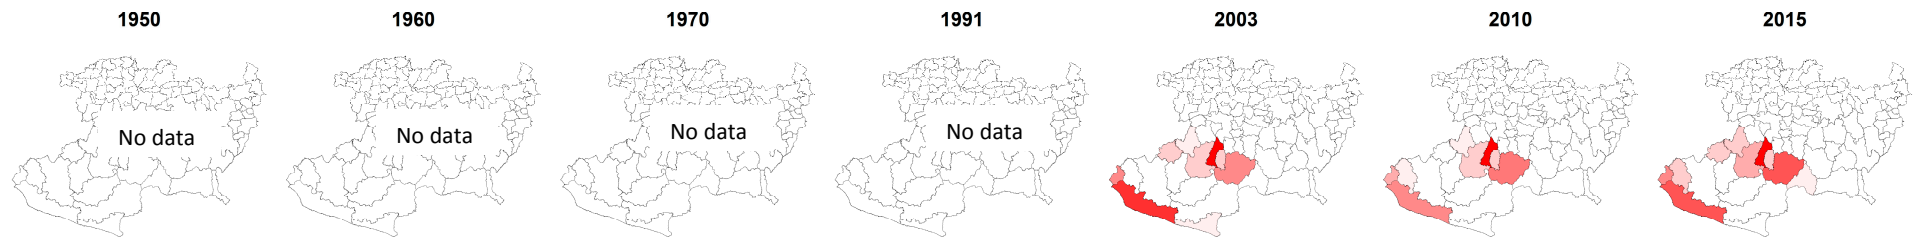

17. Peas

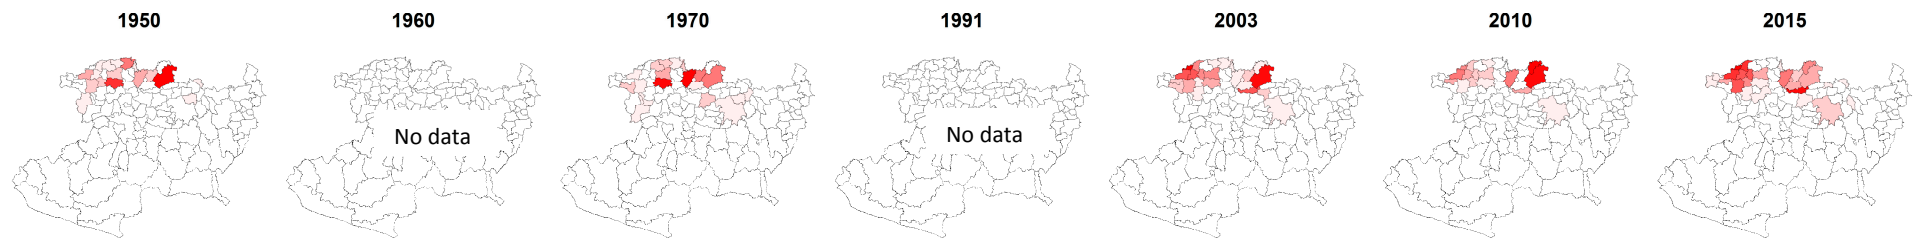

18. Potato

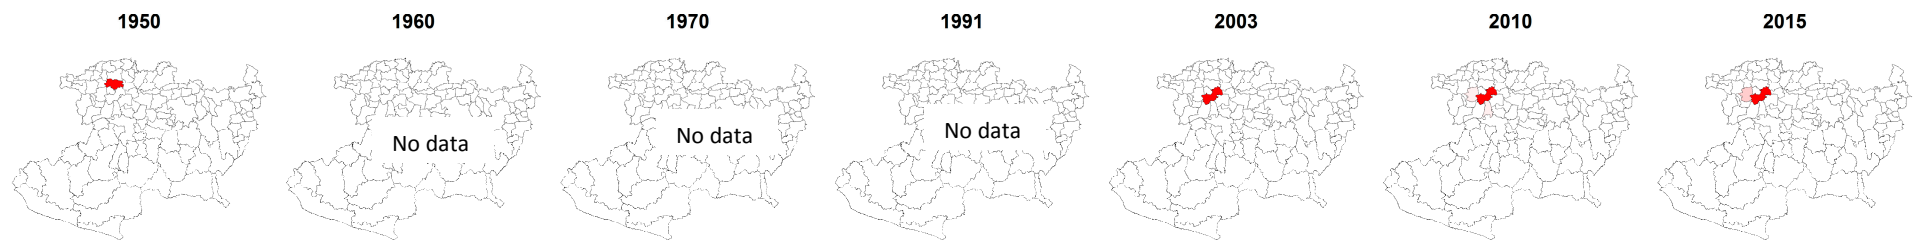

19. Strawberries

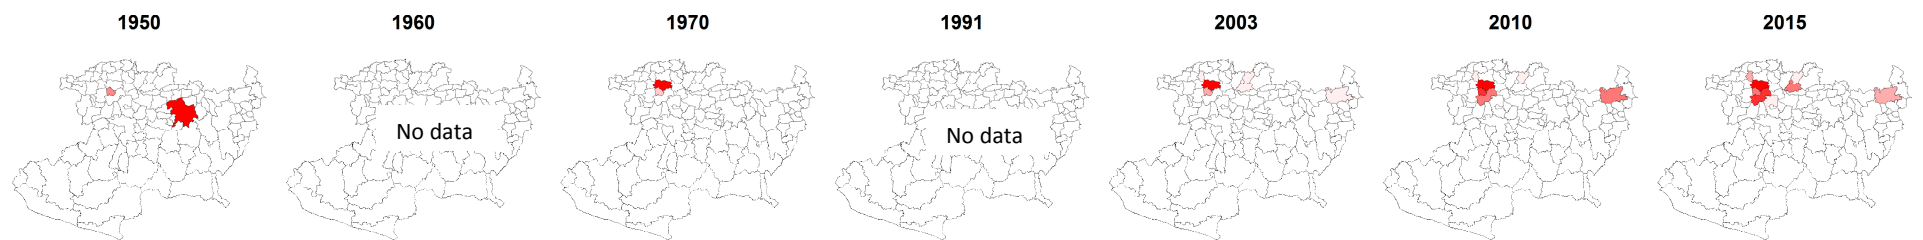



20. Sugar cane

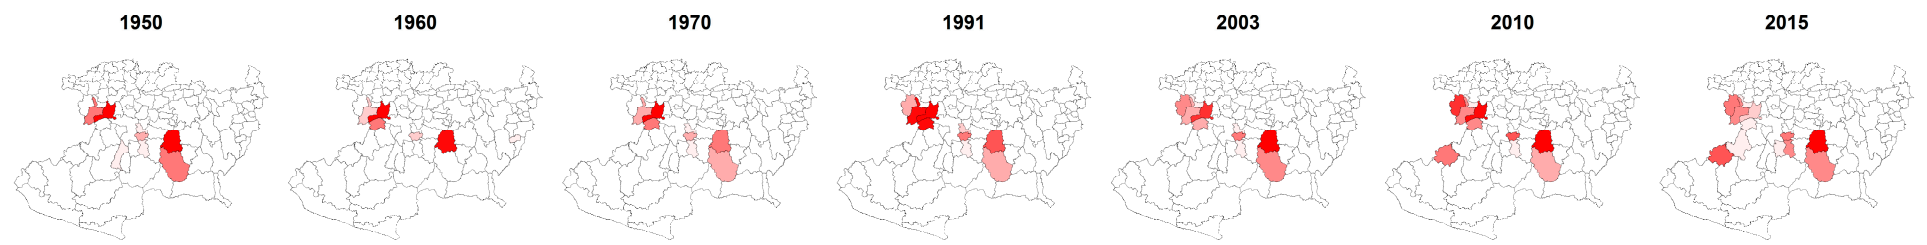

21. Tomato

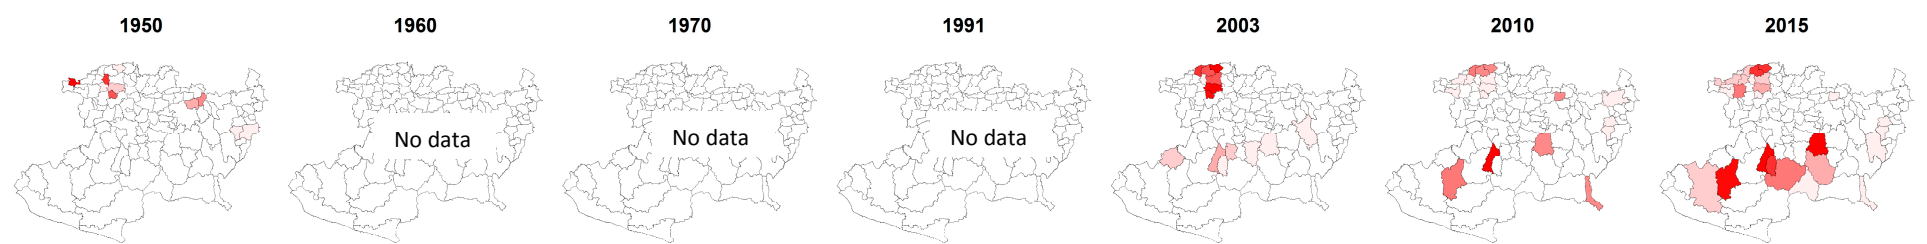

22. Vetch

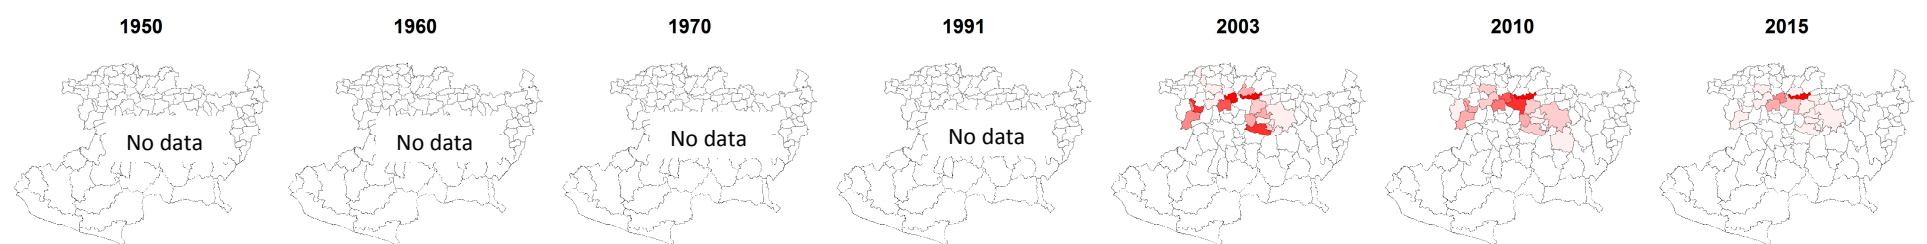

23. Wheat

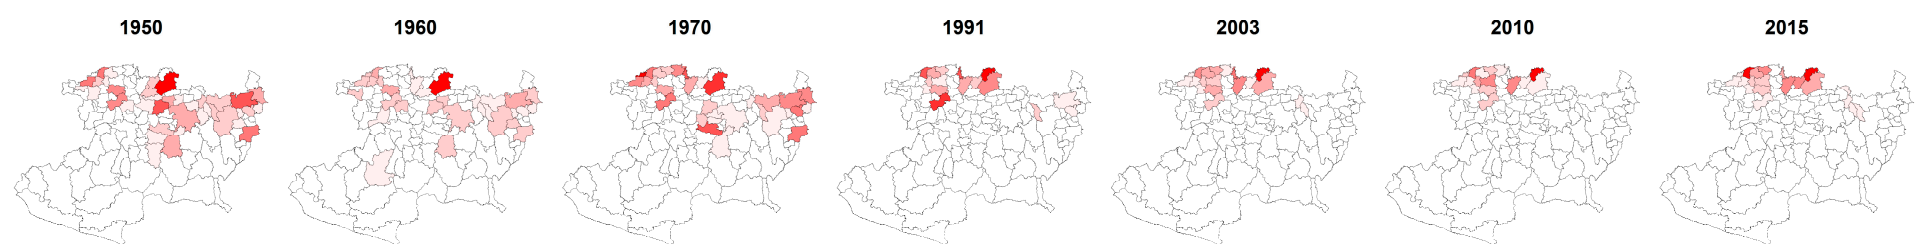

Supplement: s1 [file s1]
